# Supplementary material for: Effect of IBD medications on COVID-19 outcomes: results from an international registry
Source: HighWire-hosted journal article supplement (doi:10.1136/gutjnl-2020-322539), 2020-10-20
Supplement: gutjnl-2020-322539supp001_data_supplement.pdf [file gutjnl-2020-322539supp001_data_supplement.pdf]

**SUPPLEMENTARY TABLES****Supplementary Table 1. List of Partnering Patient and Professional Organizations**

|                                                                                            |
|--------------------------------------------------------------------------------------------|
| Agrupación Chilena de Trabajo en Enfermedad de Crohn y Colitis Ulcerosa (ACTECCU)          |
| American College of Gastroenterology (ACG)                                                 |
| American Gastroenterological Association (AGA)                                             |
| Asian Organization for Crohn's and Colitis (AOCC)                                          |
| Asia-Pacific Association of Gastroenterology (APAGE)                                       |
| BRICS IBD Consortium                                                                       |
| Canadian Association of Gastroenterology                                                   |
| Consultant360 Specialty Network                                                            |
| Crohn's and Colitis Foundation                                                             |
| Crohn's and Colitis Australia (CCA)                                                        |
| Crohn's and Colitis Canada (CCC)                                                           |
| Crohn's and Colitis India (CCI)                                                            |
| Crohn's and Colitis New Zealand (CCNZ)                                                     |
| Crohn's & Colitis UK                                                                       |
| European Crohn's and Colitis Organisation (ECCO)                                           |
| European Federation of Crohn's & Ulcerative Colitis Associations (EFCCA)                   |
| Grupo Argentino de Estudio de Enfermedad de Crohn y Colitis Ulcerosa                       |
| Grupo de Estudio de Crohn y Colitis Colombiano                                             |
| Grupo de Estudos de Doença Inflamatória Intestinal do Brasil (GEDIIB)                      |
| Grupo uruguayo de trabajo en enfermedad inflamatoria intestinal (GUTEII)                   |
| Grupo Venezolano de Trabajo en Enfermedad Inflamatoria Intestinal                          |
| Hong Kong IBD Society (HKIBS)                                                              |
| ImproveCareNow                                                                             |
| Indian Society of Gastroenterology                                                         |
| International Organization for the Study of Inflammatory Bowel Disease (IOIBD)             |
| Japanese IBD Society                                                                       |
| Korean Society for the Study of Intestinal Diseases                                        |
| Malaysia Society of Gastroenterology                                                       |
| National Taiwan GI society                                                                 |
| North American Society for Pediatric Gastroenterology, Hepatology and Nutrition (NASPGHAN) |
| Pan American Crohn's and Colitis Organization (PANCCO)                                     |
| Pediatric Inflammatory Bowel Disease Network (PIBD-NET)                                    |
| Taiwan IBD society                                                                         |
| The Gastroenterological Society of Australia (GESA)                                        |
| The Gastroenterology & Hepatology Advanced Practice Providers (GHAPP)                      |
| The New Zealand Society of Gastroenterology (NZSG)                                         |
| United European Gastroenterology (UEG)                                                     |

**Supplementary Table 2. List of Countries Contributing 10 or more cases to SECURE-IBD**

| <b>Country</b>            | <b>N</b> |
|---------------------------|----------|
| United States             | 496      |
| Spain                     | 239      |
| France                    | 96       |
| Italy                     | 72       |
| United Kingdom            | 66       |
| Russian Federation        | 60       |
| Iran, Islamic Republic of | 57       |
| Brazil                    | 41       |
| Belgium                   | 37       |
| Germany                   | 34       |
| Netherlands               | 25       |
| Canada                    | 24       |
| Switzerland               | 23       |
| Portugal                  | 21       |
| Israel                    | 16       |
| Austria                   | 15       |
| Ireland                   | 15       |
| Chile                     | 12       |

Countries contributing less than 10 cases: Turkey, Czech Republic, Dominican Republic, Norway, Greece, Australia, Finland, Japan, Cyprus, India, Argentina, Bulgaria, Egypt, Mexico, Malaysia, Qatar, United Arab Emriates, Bahrain, China, Colombia, Croatia, Hungary, Kazakhstan, New Zealand, Poland, Romania, Serbia, Sweden, Slovenia

**Supplementary Table 3. Demographics and Clinical Characteristics of COVID-19 IBD Patients Treated with TNF Antagonists Compared to Patients Not Treated with TNF Antagonists**

| Characteristic <sup>1</sup>             | TNF Antagonist<br>n=546 | No TNF Antagonist<br>n=869 | P value |
|-----------------------------------------|-------------------------|----------------------------|---------|
| Mean Age, years (SD)                    | 39.5 (16.2)             | 46.8 (17.8)                | <0.001  |
| Female, n (%)                           | 257 (47.1)              | 410 (47.2)                 | 0.88    |
| <b>Race</b>                             |                         |                            |         |
| White, n (%)                            | 452 (82.8)              | 711 (81.1)                 | 0.64    |
| Asian, n (%)                            | 22 (4)                  | 63 (7.2)                   | 0.01    |
| Black, n (%)                            | 43 (7.9)                | 51 (5.9)                   | 0.14    |
| <b>Ethnicity</b>                        |                         |                            |         |
| Hispanic, n (%)                         | 90 (16.5)               | 155 (17.8)                 | 0.87    |
| CD, n (%)                               | 377 (69)                | 407 (46.8)                 | <0.001  |
| UC/IBD-U, n (%)                         | 169 (31)                | 462 (53.2)                 |         |
| <b>Disease Activity</b>                 |                         |                            | 0.07    |
| Remission, n (%)                        | 335 (61.4)              | 477 (54.9)                 |         |
| Mild, n (%)                             | 89 (16.3)               | 165 (19)                   |         |
| Moderate/Severe, n (%)                  | 107 (19.6)              | 191 (22)                   |         |
| Missing/Unknown, n (%)                  | 15 (2.7)                | 36 (4.1)                   |         |
| Current smoker, n (%)                   | 23 (4.2)                | 44 (5.1)                   | 0.46    |
| <b>Any Comorbidity, n (%)</b>           | 165 (30.2)              | 361 (41.5)                 | <0.001  |
| Cardiovascular Disease, n (%)           | 28 (5.1)                | 79 (9.1)                   | 0.01    |
| Diabetes, n (%)                         | 13 (2.4)                | 69 (7.9)                   | <0.001  |
| Cancer, n (%)                           | 2 (0.4)                 | 31 (3.6)                   | <0.001  |
| BMI $\geq$ 30 kg/m <sup>2</sup> , n (%) | 92 (16.8)               | 143 (16.5)                 | 0.07    |
| Mesalamine/Sulfasalazine, n (%)         | 75 (13.7)               | 357 (41.1)                 | <0.001  |
| Thiopurine, n (%)                       | 136 (24.9)              | 140 (16.1)                 | <0.001  |
| Corticosteroid, n (%)                   | 33 (6)                  | 77 (8.9)                   | 0.05    |
| Severe COVID-19, n (%)                  | 21 (3.8)                | 90 (10.4)                  | <0.001  |

|                                                            |         |          |        |
|------------------------------------------------------------|---------|----------|--------|
| <b>Death from COVID-19 or related complications, n (%)</b> | 6 (1.1) | 42 (4.8) | <0.001 |
|------------------------------------------------------------|---------|----------|--------|

1. Percentages and n from each subcategory may not add up to the exact number of total reported cases due to missing values and/or non-mutually exclusive variables.

TNF: tumour necrosis factor; SD: standard deviation; CD: Crohn's disease; UC: ulcerative colitis; IBD-U: inflammatory bowel disease unclassified; BMI: body mass index

**Supplementary Table 4. Reduced Model with Adjusted Analysis Comparing the Impact of TNF Antagonist Monotherapy with Thiopurine Monotherapy and Combination Therapy on Risk of Severe COVID-19**

| <b>Parameter*</b>                          | <b>Adjusted OR</b> | <b>95% CI lower limit</b> | <b>95% CI upper limit</b> | <b>P value</b> |
|--------------------------------------------|--------------------|---------------------------|---------------------------|----------------|
| <b>Combination therapy</b>                 | 3.54               | 1.63                      | 7.69                      | 0.001          |
| <b>Thiopurine monotherapy</b>              | 3.59               | 1.29                      | 9.96                      | 0.014          |
| <b>ref=TNF antagonist monotherapy</b>      |                    |                           |                           |                |
| <b>Age</b>                                 | 1.04               | 1.02                      | 1.07                      | 0.0003         |
| <b>Cardiovascular disease (yes vs. no)</b> | 3.29               | 1.73                      | 6.30                      | 0.0003         |
| <b>Corticosteroid use (yes vs. no)</b>     | 4.63               | 1.82                      | 11.79                     | 0.001          |

\*Variables selected using backward selection. Initial variables include age, sex, race (Asian vs. non-Asian), disease type, disease activity, cardiovascular disease, corticosteroids, sulfasalazine/mesalamine. OR: odds ratio; CI: confidence interval

**Supplementary Table 5. Demographics and Clinical Characteristics of COVID-19 IBD Patients Treated with Mesalamines, TNF Antagonists, or the Combination**

| Characteristic <sup>1</sup>             | 5-ASA/Sulfasalazine without TNF Antagonist<br>n=357 | TNF Antagonist without 5-ASA/Sulfasalazine<br>N=471 | P value <sup>2</sup> | Combination<br>N=75 | P value <sup>3</sup> |
|-----------------------------------------|-----------------------------------------------------|-----------------------------------------------------|----------------------|---------------------|----------------------|
| Mean Age, years (SD)                    | 50.1 (18.8)                                         | 38.5 (16.1)                                         | <0.001               | 45.3                | 0.001                |
| Female, n (%)                           | 162 (45.4)                                          | 215 (45.6)                                          | 0.86                 | 42 (56)             | 0.11                 |
| <b>Race</b>                             |                                                     |                                                     |                      |                     |                      |
| White, n (%)                            | 305 (85.4)                                          | 390 (82.8)                                          | 0.38                 | 62 (82.7)           | 0.98                 |
| Asian, n (%)                            | 43 (12)                                             | 11 (2.3)                                            | <0.001               | 11 (14.7)           | <0.001               |
| Black, n (%)                            | 12 (3.4)                                            | 42 (8.9)                                            | 0.001                | 1 (1.3)             | 0.02                 |
| <b>Ethnicity</b>                        |                                                     |                                                     |                      |                     |                      |
| Hispanic, n                             | 77 (21.6)                                           | 77 (16.3)                                           | 0.03                 | 12 (17.3)           | 0.32                 |
| CD, n (%)                               | 77 (21.6)                                           | 355 (75.4)                                          | <0.001               | 22 (29.3)           | <0.001               |
| UC/IBD-U, n (%)                         | 270 (75.6)                                          | 110 (23.4)                                          |                      | 52 (69.3)           |                      |
| <b>Disease Activity</b>                 |                                                     |                                                     |                      |                     |                      |
| Remission, n (%)                        | 200 (56)                                            | 304 (64.5)                                          | 0.09                 | 31 (41.3)           | 0.001                |
| Mild, n (%)                             | 72 (20.2)                                           | 75 (15.9)                                           |                      | 14 (18.7)           |                      |
| Moderate/Severe, n (%)                  | 72 (20.2)                                           | 80 (17)                                             |                      | 27 (36)             |                      |
| Missing/Unknown, n (%)                  | 13 (3.6)                                            | 12 (2.6)                                            |                      | 3 (4)               |                      |
| Current smoker, n (%)                   | 12 (3.4)                                            | 21 (4.5)                                            | 0.42                 | 2 (2.7)             | 0.47                 |
| Any Comorbidity, n (%)                  | 159 (44.5)                                          | 135 (28.7)                                          | <0.001               | 30 (40)             | 0.047                |
| Cardiovascular Disease, n (%)           | 46 (12.9)                                           | 23 (4.9)                                            | <0.001               | 5 (6.7)             | 0.52                 |
| BMI $\geq$ 30 kg/m <sup>2</sup> , n (%) | 53 (14.8)                                           | 76 (16.1)                                           | 0.17                 | 16 (21.3)           | 0.54                 |
| Corticosteroid, n (%)                   | 34 (9.5)                                            | 22 (4.7)                                            | 0.006                | 11 (14.7)           | 0.001                |

|                                                            |           |         |        |         |       |
|------------------------------------------------------------|-----------|---------|--------|---------|-------|
| <b>Severe COVID-19, n (%)</b>                              | 27 (7.6)  | 6 (1.3) | <0.001 | 0 (0)   | 0.57  |
| <b>Death from COVID-19 or related complications, n (%)</b> | 53 (14.8) | 14 (3)  | <0.001 | 7 (9.3) | 0.008 |

1. Percentages and n from each subcategory may not add up to the exact number of total reported cases due to missing values and/or non-mutually exclusive variables.
2. P value comparing 5-ASA/sulfasalazine without TNF antagonist to TNF antagonist without 5-ASA/sulfasalazine
3. P value comparing combination of TNF antagonist and 5-ASA/sulfasalazine to TNF antagonist without 5-ASA/sulfasalazine

5-ASA: 5-aminosalicylates (mesalamine); SD: standard deviation; CD: Crohn's disease; UC: ulcerative colitis; IBD-U: inflammatory bowel disease unclassified; BMI: body mass index; TNF: tumour necrosis factor

**Supplementary Table 6. Demographics and Clinical Characteristics of COVID-19 IBD Patients Treated with TNF Antagonist or IL12/23 Antagonist Monotherapy**

| Characteristic <sup>1</sup>                         | TNF Antagonist Monotherapy<br>n=409 | IL12/23 Antagonist Monotherapy<br>n=119 | P value |
|-----------------------------------------------------|-------------------------------------|-----------------------------------------|---------|
| Mean Age, years (SD)                                | 38.5 (16.2)                         | 39.7 (14.5)                             | 0.47    |
| Female, n (%)                                       | 194 (47.4)                          | 67 (56.3)                               | 0.14    |
| <b>Race</b>                                         |                                     |                                         |         |
| White, n (%)                                        | 337 (82.4)                          | 91 (76.5)                               | 0.65    |
| Asian, n (%)                                        | 10 (2.4)                            | 1 (0.8)                                 | 0.28    |
| Black, n (%)                                        | 35 (8.6)                            | 8 (6.7)                                 | 0.52    |
| <b>Ethnicity</b>                                    |                                     |                                         |         |
| Hispanic, n (%)                                     | 63 (15.4)                           | 15 (12.6)                               | 0.64    |
| CD, n (%)                                           | 291 (71.1)                          | 108 (90.8)                              | 0.19    |
| UC/IBD-U, n (%)                                     | 118 (28.9)                          | 11 (0.8)                                |         |
| <b>Disease Activity</b>                             |                                     |                                         |         |
| Remission, n (%)                                    | 258 (63.1)                          | 62 (52.1)                               | 0.19    |
| Mild, n (%)                                         | 69 (16.9)                           | 21 (17.6)                               |         |
| Moderate/Severe, n (%)                              | 71 (17.3)                           | 31 (27)                                 |         |
| Missing/Unknown, n (%)                              | 11 (2.7)                            | 5 (4.2)                                 |         |
| Current smoker, n (%)                               | 16 (3.9)                            | 7 (5.9)                                 | 0.35    |
| Any Comorbidity, n (%)                              | 114 (27.9)                          | 48 (40.3)                               | 0.009   |
| Cardiovascular Disease, n (%)                       | 15 (3.7)                            | 6 (5)                                   | 0.50    |
| BMI $\geq$ 30 kg/m <sup>2</sup> , n (%)             | 62 (15.2)                           | 25 (21)                                 | 0.19    |
| Corticosteroid, n (%)                               | 16 (3.9)                            | 9 (7.6)                                 | 0.10    |
| Severe COVID-19, n (%)                              | 9 (2.2)                             | 4 (3.4)                                 | 0.47    |
| Death from COVID-19 or related complications, n (%) | 3 (0.7)                             | 1 (0.8)                                 | 0.86    |



**Supplementary Table 7. Adjusted Analyses Comparing the Impact of Different Biologic Classes on Severe COVID-19**

| Medication Comparison                                                                   | OR (95% CI)      | aOR (95% CI)     | P value <sup>3</sup> | Total n in model | N with severe COVID-19 | N without severe COVID-19 |
|-----------------------------------------------------------------------------------------|------------------|------------------|----------------------|------------------|------------------------|---------------------------|
| <b>IL12/23 antagonist monotherapy</b><br>(ref=TNF antagonist monotherapy) <sup>1</sup>  | 1.63 (0.66-4.04) | 0.98 (0.12-8.06) | 0.98                 | 528              | 13                     | 515                       |
| <b>Integrin antagonist monotherapy</b><br>(ref=TNF antagonist monotherapy) <sup>2</sup> | 2.90 (1.09-7.74) | 2.42 (0.59-9.96) | 0.22                 | 532              | 18                     | 514                       |

1. Model adjusted for age, sex, disease type, cardiovascular disease, corticosteroids, sulfasalazine/mesalamine
2. Model adjusted for age, sex, disease type, number of comorbidities (0, 1, 2+), corticosteroids, sulfasalazine/mesalamine
3. P value for adjusted model

TNF: tumour necrosis factor; IL12/23: interleukin-12/23; OR: odds ratio, CI: confidence interval;  
aOR: adjusted OR

**Supplementary Table 8. Demographics and Clinical Characteristics of COVID-19 IBD Patients Treated with TNF Antagonist or Integrin Antagonist Monotherapy**

| Characteristic                                      | TNF Antagonist Monotherapy<br>n=407 | Integrin Antagonist Monotherapy<br>n=125 | P value |
|-----------------------------------------------------|-------------------------------------|------------------------------------------|---------|
| Mean Age, years (SD)                                | 38.6 (16.2)                         | 45.9 (19.3)                              | <0.001  |
| Female, n (%)                                       | 193 (47.4)                          | 65 (52)                                  | 0.41    |
| <b>Race</b>                                         |                                     |                                          |         |
| White, n (%)                                        | 335 (82.3)                          | 103 (82.4)                               | 0.98    |
| Asian, n (%)                                        | 10 (2.5)                            | 4 (3.2)                                  | 0.65    |
| Black, n (%)                                        | 35 (8.6)                            | 9 (7.2)                                  | 0.62    |
| <b>Ethnicity</b>                                    |                                     |                                          |         |
| Hispanic, n (%)                                     | 63 (15.5)                           | 14 (11.2)                                | 0.01    |
| CD, n (%)                                           | 290 (71.3)                          | 55 (44)                                  | <0.001  |
| UC/IBD-U, n (%)                                     | 117 (28.7)                          | 70 (56)                                  |         |
| <b>Disease Activity</b>                             |                                     |                                          |         |
| Remission, n (%)                                    | 257 (63.1)                          | 67 (53.6)                                | 0.18    |
| Mild, n (%)                                         | 69 (17)                             | 22 (17.6)                                |         |
| Moderate/Severe, n (%)                              | 70 (17.2)                           | 29 (23.2)                                |         |
| Missing/Unknown, n (%)                              | 11 (2.7)                            | 7 (5.6)                                  |         |
| Current smoker, n (%)                               | 16 (3.9)                            | 5 (4)                                    | 0.97    |
| <b>Any Comorbidity, n (%)</b>                       | 114 (28)                            | 45 (36)                                  | 0.09    |
| Cardiovascular Disease, n (%)                       | 15 (3.7)                            | 6 (4.8)                                  | 0.58    |
| Diabetes, n (%)                                     | 7 (1.7)                             | 8 (6.4)                                  | 0.006   |
| Cancer, n (%)                                       | 2 (0.5)                             | 5 (4)                                    | 0.003   |
| Stroke, n (%)                                       | 0 (0)                               | 3 (2.4)                                  | 0.002   |
| Chronic kidney disease, n (%)                       | 4 (1)                               | 5 (4)                                    | 0.02    |
| BMI $\geq$ 30 kg/m <sup>2</sup> , n (%)             | 61 (15)                             | 23 (18.4)                                | 0.49    |
| Corticosteroid, n (%)                               | 16 (3.9)                            | 5 (4)                                    | 0.97    |
| Severe COVID-19, n (%)                              | 9 (2.2)                             | 9 (7.2)                                  | 0.03    |
| Death from COVID-19 or related complications, n (%) | 3 (0.7)                             | 4 (3.2)                                  | 0.02    |
